# Supplementary material
Source: MDPI journal article supplement (https://www.mdpi.com/2073-4395/13/9/2318)
Supplement: s1 [file s1 › agronomy-2474244-supplementary.pdf]

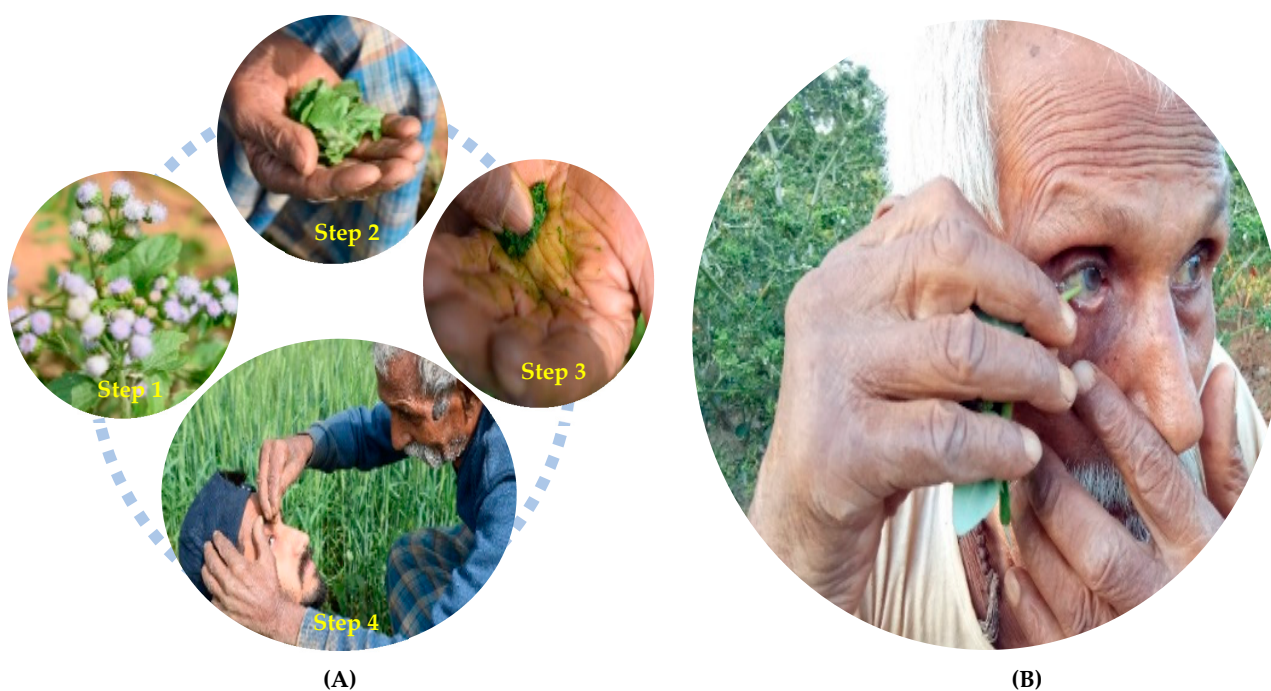

**Supplementary Figure S1.** On field demonstration of the medical application by the local practitioner (A) Different stages of medical application of *Ageratum conyzoides*, step 1: identification of the plant step 2: plucking of suitable tender leaves step 3: crushing the tender leaves on the palm step 4: juice drops applied directly on the eye for cleaning the eye and improving the eye sight. (B) Local tribal practitioner using freshly plucked *Scoparia dulcis* and applying the milk directly on the eyes for treating conjunctivitis.

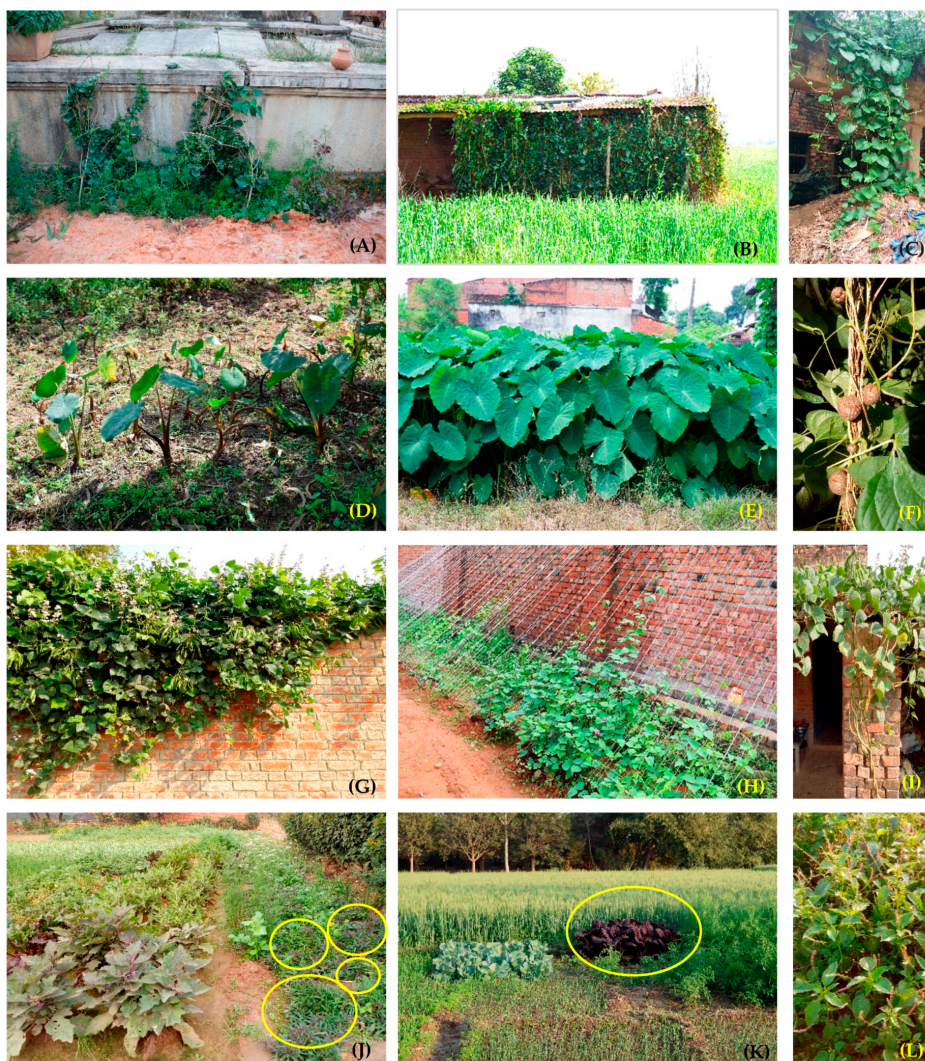

**Supplementary Figure S2.** Field observations of cultivation of NUCs in different small space settings for diet diversification and germplasm conservation. such as (A–C) *Basella alba* is commonly observed during the study as edible nutritious crop in kitchen garden, boundary crop and backyard garden respectively, (D) *Colocasia esculenta* grown in the backyard garden of local farmer, (E) *Colocasia antiquorum* in backyard garden, (F) *Dioscorea bulbifera* in kitchen garden, (G–I) *Dolichos lablab* grown in the home garden with the support of boundary wall, (J) *Ipomoea batatas* in field as crop diversification, (K) *Brassica juncea* in field as crop diversification, (L) *Diger muricata* in kitchen garden.
